# Supplementary material for: A phase 1 study of the irreversible FLT3 inhibitor FF-10101 in relapsed or refractory acute myeloid leukemia
Source: PubMed Central journal article supplement — Blood Adv. 2024 Mar 21;8(10):2527–35. doi: 10.1182/bloodadvances.2023010619 (PMC11131057; doi:10.1182/bloodadvances.2023010619), 2024-03-21
Supplement: BLOODA_ADV-2023-010619-mmc1.pdf [file BLOODA_ADV-2023-010619-mmc1.pdf]

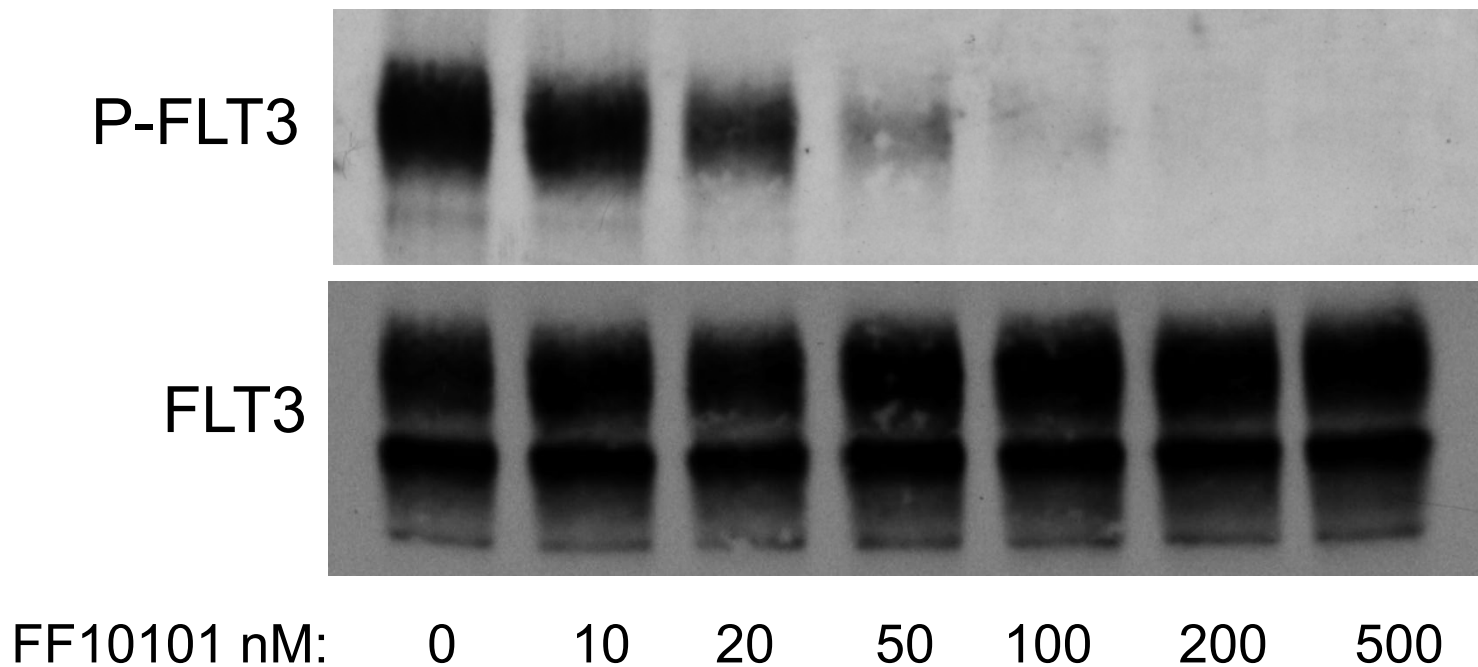

**Supplementary Figure 1. Dose response of FF-10101 against phosphorylated FLT3 in plasma.** FF-10101 (supplied by FujiFilm, Inc., Kanagawa, Japan) was spiked at the indicated concentrations into 100% human plasma. Molm-14 cells (FLT3-ITD-expressing human AML cell line) were incubated for 1 hour and analyzed for P-FLT3 by immunoprecipitation and immunoblotting. Regression analysis (after linear conversion) of the densitometric data resulted in an estimated  $IC_{50}$  of 20 nM.

Supplementary Figure 1.

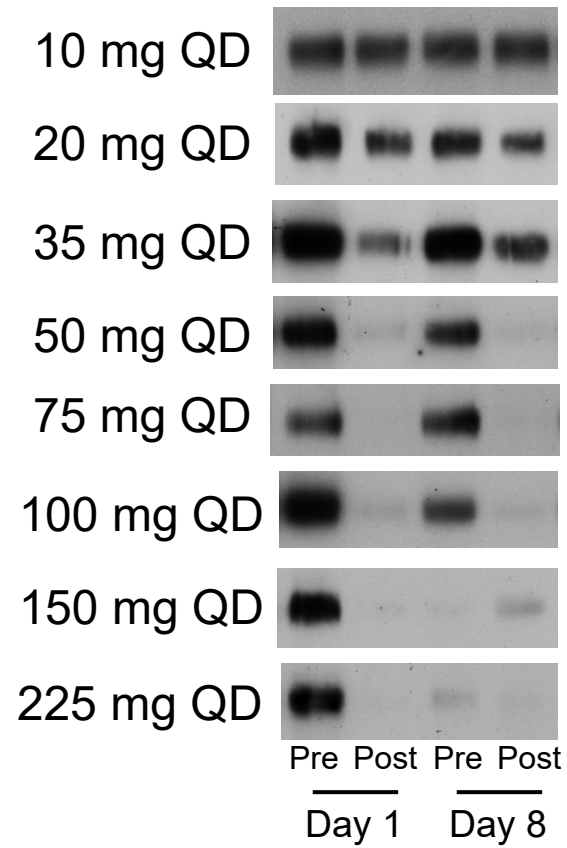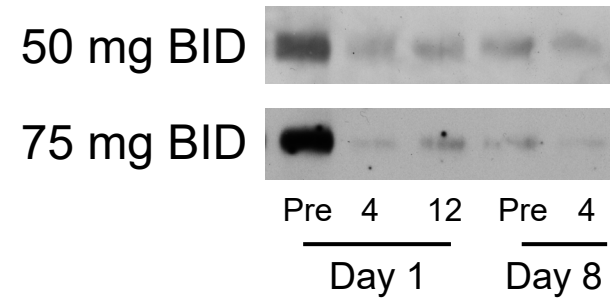

**Supplementary Figure 2. PIA assay results for each dose level.** The PIA assay for FLT3 was performed as described in Methods using plasma collected at designated time points in each cohort. Representative blots for Day 1 and Day 8 of cycle 1 are displayed. “Pre” refers to the sample collected immediately prior to dosing for the day.

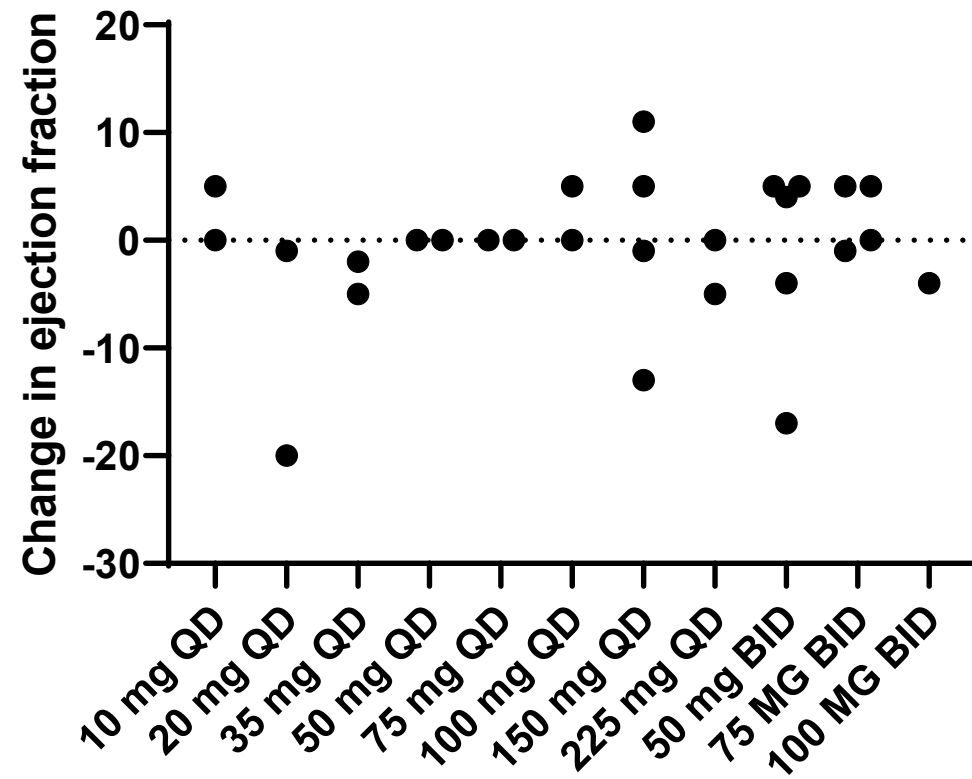

Supplementary Figure 3

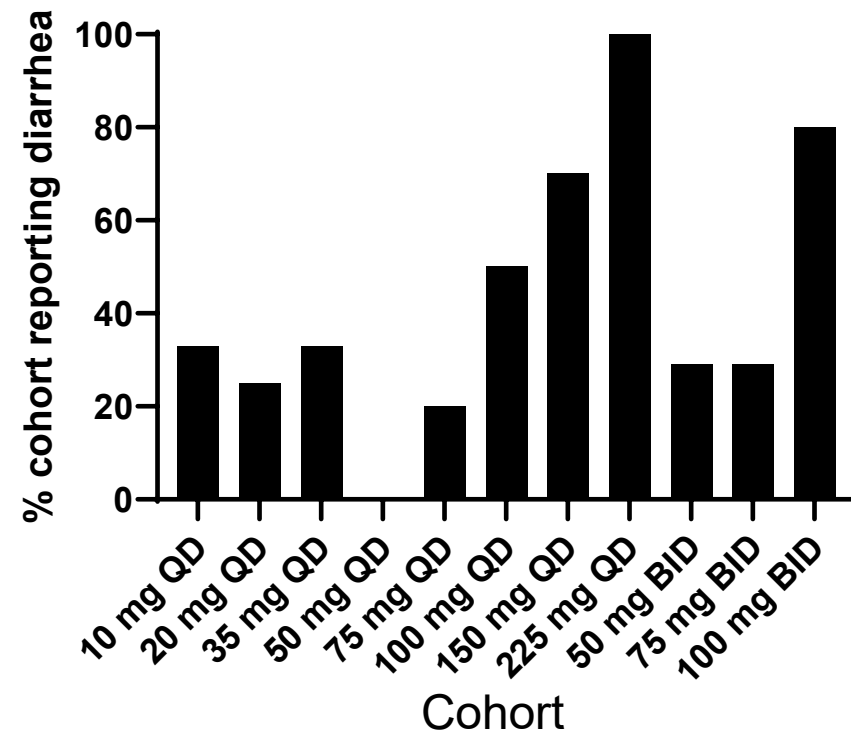

Supplementary Figure 4

**Supplementary Table 1. Incidence of Grade  $\geq 3$  Treatment-Emergent Adverse Events**

**(n=54 patients)**

| <b>Preferred Term</b>             | <b>Grade 3 / 4<br/>n (%)</b> | <b>Grade 5<br/>n (%)</b> |
|-----------------------------------|------------------------------|--------------------------|
| Thrombocytopenia                  | 16 (29.6)                    |                          |
| Febrile neutropenia               | 13 (24.1)                    |                          |
| Anemia                            | 11 (20.4)                    |                          |
| Pneumonia                         | 8 (14.8)                     |                          |
| AST, increased                    | 7 (13.0)                     |                          |
| Leukopenia                        | 7 (13.0)                     |                          |
| Neutropenia                       | 7 (13.0)                     |                          |
| Hypophosphatemia                  | 6 (11.1)                     |                          |
| Creatine phosphokinase, increased | 5 (9.3)                      |                          |
| Hypokalemia                       | 5 (9.3)                      |                          |
| ALT, increased                    | 4 (7.4)                      |                          |
| Diarrhea                          | 4 (7.4)                      |                          |
| Differentiation syndrome          | 4 (7.4)                      |                          |
| Device-related infection          | 3 (5.6)                      |                          |
| Pneumonia, fungal                 | 3 (5.6)                      |                          |
| Rash                              | 3 (5.6)                      |                          |
| Troponin, increased               | 3 (5.6)                      |                          |
| Back pain                         | 2 (3.7)                      |                          |
| Delirium                          | 2 (3.7)                      |                          |
| Hypotension                       | 2 (3.7)                      |                          |
| Leukocytosis                      | 2 (3.7)                      |                          |
| Respiratory failure               | 2 (3.7)                      |                          |
| Sepsis                            | 2 (3.7)                      | 3 (5.6)                  |
| Stomatitis                        | 2 (3.7)                      |                          |
| Subdural hematoma                 | 2 (3.7)                      | 1 (1.9)                  |
| Urinary tract infection           | 2 (3.7)                      |                          |
| Abdominal pain, upper             | 1 (1.9)                      |                          |
| Alkaline phosphatase, increased   | 1 (1.9)                      |                          |
| Cardiac failure                   | 1 (1.9)                      |                          |
| Cardiac failure, congestive       |                              | 1 (1.9)                  |
| Cardiomyopathy                    | 1 (1.9)                      |                          |
| Cellulitis                        | 1 (1.9)                      |                          |
| Chills                            | 1 (1.9)                      |                          |
| Cholelithiasis                    | 1 (1.9)                      |                          |
| CNS infection, fungal             | 1 (1.9)                      |                          |
| CNS leukemia                      | 1 (1.9)                      |                          |
| Decreased appetite                | 1 (1.9)                      |                          |
| Ejection fraction, abnormal       | 1 (1.9)                      |                          |
| Enterococcal infection            | 1 (1.9)                      |                          |
| External ear cellulitis           | 1 (1.9)                      |                          |

|                                 |         |         |
|---------------------------------|---------|---------|
| Facial edema                    | 1 (1.9) |         |
| Fatigue                         | 1 (1.9) |         |
| Gastric hemorrhage              | 1 (1.9) |         |
| Gastrointestinal hemorrhage     | 1 (1.9) |         |
| Hemolysis                       | 1 (1.9) |         |
| Hyperglycemia                   | 1 (1.9) |         |
| Hypermagnesemia                 | 1 (1.9) |         |
| Hypertension                    | 1 (1.9) |         |
| Hypertriglyceridemia            | 1 (1.9) |         |
| Hyperuricemia                   | 1 (1.9) |         |
| Hypoalbuminemia                 | 1 (1.9) |         |
| Hypocalcemia                    | 1 (1.9) |         |
| Hypoxia                         | 1 (1.9) |         |
| Loss of consciousness           | 1 (1.9) |         |
| Lymphopenia                     | 1 (1.9) |         |
| Mucosal Inflammation            | 1 (1.9) |         |
| Muscular weakness               | 1 (1.9) |         |
| Nausea                          | 1 (1.9) |         |
| Nephrolithiasis                 | 1 (1.9) |         |
| Neutrophilia                    | 1 (1.9) |         |
| Osteomyelitis, bacterial        | 1 (1.9) |         |
| Periorbital edema               | 1 (1.9) |         |
| Procedural pain                 | 1 (1.9) |         |
| Pulmonary amyloidosis           | 1 (1.9) |         |
| Pulmonary embolism              |         | 1 (1.9) |
| Pulmonary hemorrhage            |         | 1 (1.9) |
| Pulmonary sepsis                |         | 1 (1.9) |
| Pyrexia                         | 1 (1.9) |         |
| QT prolonged                    | 1 (1.9) |         |
| Skin infection                  | 1 (1.9) |         |
| Squamous cell carcinoma of skin | 1 (1.9) |         |
| Staphylococcal infection        | 1 (1.9) |         |
| Streptococcal bacteremia        | 1 (1.9) |         |
| Tachycardia                     | 1 (1.9) |         |
| Urine output, decreased         | 1 (1.9) |         |

**Supplementary Table 2.** Detailed clinical data from responders.

| History                                                                                                                                                                                                                                                                                                                        | FLT3 | Prior TKI    | Dose       | Response | Response description                                                                                                                   |
|--------------------------------------------------------------------------------------------------------------------------------------------------------------------------------------------------------------------------------------------------------------------------------------------------------------------------------|------|--------------|------------|----------|----------------------------------------------------------------------------------------------------------------------------------------|
| 56 yo F, diploid karyotype, mutations in DNMT3a, Runx1, and a FLT3-ITD mutation. At initial diagnosis treated with 7+3+midostaurin, achieved remission and relapsed after consolidation. Enrolled on FF-10101 at relapse.                                                                                                      | ITD  | Midostaurin  | 75 mg BID  | CR       | Baseline blasts in marrow 21%. On day 28 of cycle 1, marrow blasts 1%, ANC 1.74, platelets 179K. Off study for allogeneic transplant.  |
| 78 yo M diagnosed with CMML initially, treated on protocol with azacitidine + sapatolimab, progressed to AML with a complex karyotype, mutations in TET2, SRSF2, ASXL1, PTPN11. Treated with cytarabine, daunorubicin, and ixazomib on protocol, refractory.                                                                   | WT   | None         | 100 mg BID | CRh      | Baseline blasts in marrow 18%. At completion of cycle 3, marrow blasts <5%, ANC 0.99, platelets 73K.                                   |
| 78 yo M diagnosed with AML, trisomy 13, mutations in ASXL1, Runx1, and FLT3-ITD. Refractory to 2 cycles azacitidine + venetoclax.                                                                                                                                                                                              | ITD  | None         | 50 mg BID  | CRp      | Baseline blasts in marrow 69%. At completion of cycle 2, marrow blasts 3%, ANC 6.0, platelets 14K, but not requiring any transfusions. |
| 84 yo F diagnosed with AML with deletions of 13q and 5q, mutations in TET2, EZH2, Runx1. FLT3-ITD and FLT3-TKD mutations detectable, but below 1%. No response to Aza alone, treated with gilteritinib alone, responded, but progressed after 4 months. FLT3-ITD mutation undetected by conventional PCR at start of FF-10101. | WT   | Gilteritinib | 50 mg BID  | CRp      | Baseline blasts in marrow 30%. After 4 cycles, marrow blasts 1%, ANC 2.44, platelets 13K.                                              |
| 76 yo M diagnosed with AML, diploid karyotype with mutations in DNMT3a and NPM1, and a FLT3-ITD mutation. 7 + 3 + gilteritinib followed by allogeneic transplant. At relapse, karyotype was complex and FLT3-ITD no longer present, but DNMT3a and NPM1 still present.                                                         | WT   | Gilteritinib | 75 mg BID  | PR       | Marrow blasts at baseline 31%. After one cycle, marrow blasts at 10%, ANC 2.79, platelets 179K.                                        |

yo = Years old; M = male; F = female; ANC = absolute neutrophil count; K = thousand. QD = once per day. BID = twice daily.
